# Supplementary material for: Population and subspecies diversity at mouse centromere satellites
Source: PubMed Central journal article supplement (PMC8052823; doi:10.1186/s12864-021-07591-5), 2021-04-17
Supplement: 12864_2021_7591_MOESM7_ESM.pdf [file 12864_2021_7591_MOESM7_ESM.pdf]

proportion of cells with micronuclei

M12

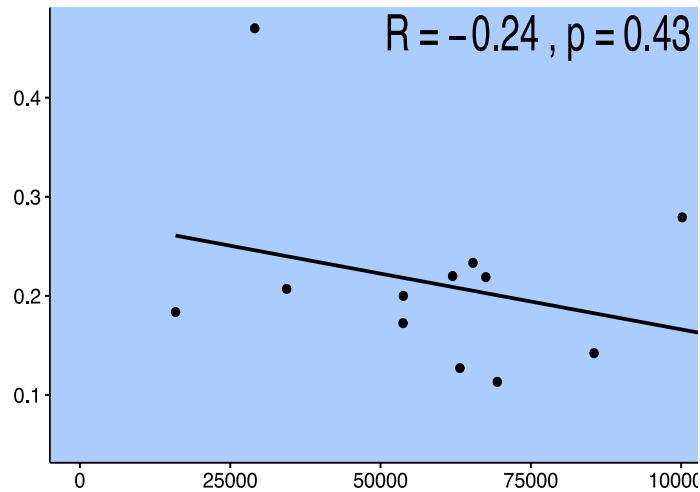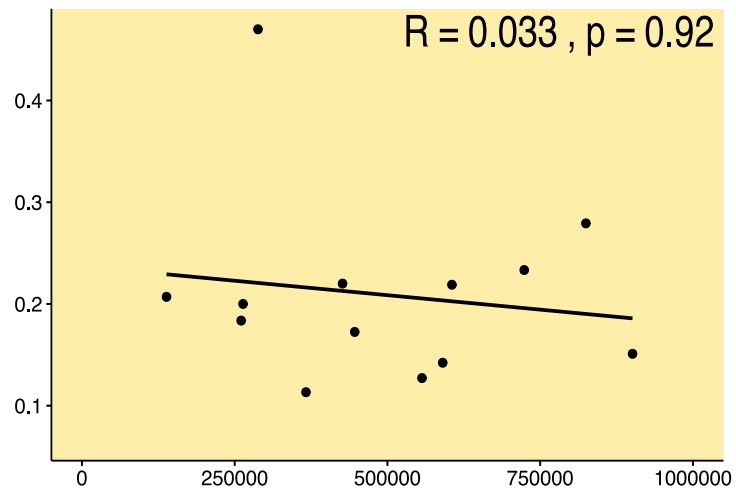

M20

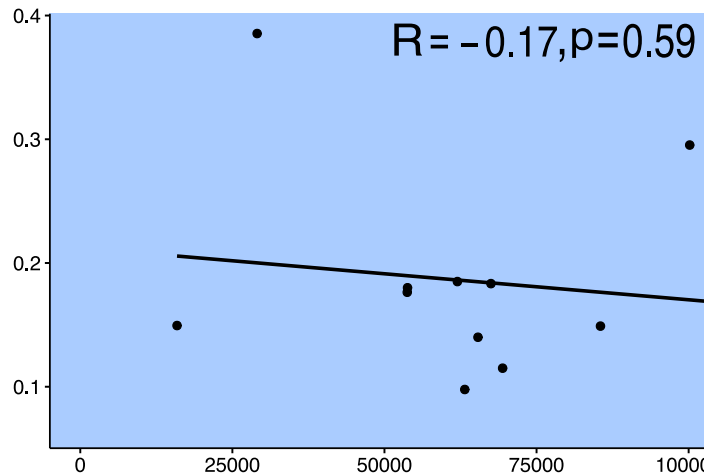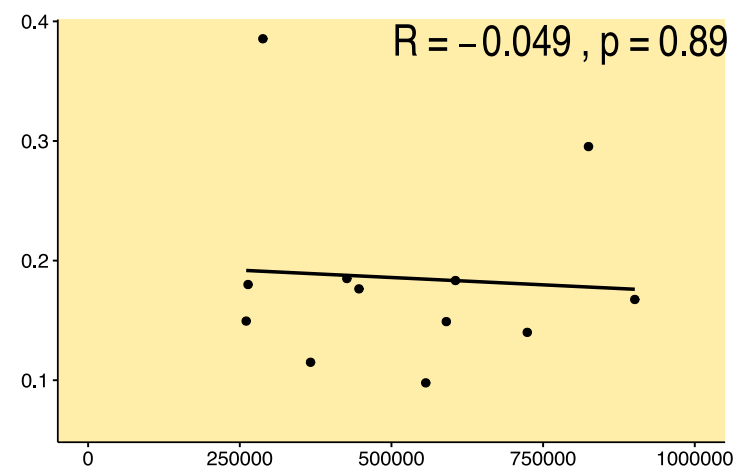

Consensus centromere satellite copy number
